# Supplementary material
Source: Springer Nature journal article supplement (https://www.springermedizin.de/resource/supplementary/13054_2011_552_MOESM2_ESM.pdf/9708758)
Supplement: MOESM2 [file 9708758]

1482 citations identified

1481 from electronic databases

1 from reference list of review article

51 citations retrieved and reviewed for inclusion

Excluded

n=3 (partial duplication of data in included study)

n=20 (no comparison to routine CXR strategy)

n=1 (published only as abstract)

n=4 (wrong population)

n=2 (multiple interventions)

n=12 (wrong design [letter, review, survey])

9 studies included in the systematic review

3 trials

6 before-after observational studies
